# Supplementary material for: Milder loss of insulin-containing islets in individuals with type 1 diabetes and type 2 diabetes-associated TCF7L2 genetic variants
Source: PubMed Central journal article supplement (PMC9729318; doi:10.1007/s00125-022-05818-y), 2022-10-25
Supplement: 125_2022_5818_MOESM1_ESM.pdf [file 125_2022_5818_MOESM1_ESM.pdf]

**Electronic Supplementary Material (ESM)**

**ESM Table 1. Supplementary Tables of Reagents: Primary Antibodies (Table 1A) and Accessory Agents (Table 1B)**

**1A. Primary Antibodies**

| <b>Primary Antibody</b> | <b>Manufacturer and catalogue No.</b>                                             | <b>Antigen Retrieval</b> | <b>Antibody Dilution</b> | <b>Secondary Antibody Details</b>                                                    | <b>Validation</b>                                                                                                                                                                                                                                                                                                                                                                                                                                                                                                                                                                                                              |
|-------------------------|-----------------------------------------------------------------------------------|--------------------------|--------------------------|--------------------------------------------------------------------------------------|--------------------------------------------------------------------------------------------------------------------------------------------------------------------------------------------------------------------------------------------------------------------------------------------------------------------------------------------------------------------------------------------------------------------------------------------------------------------------------------------------------------------------------------------------------------------------------------------------------------------------------|
| <b>Insulin</b>          | Dako C#A0564<br>Guinea-pig polyclonal<br>(now supplied by Agilent)<br>C#IR00261-2 | 10mM citrate<br>pH6.0    | 1/600 for 1h at<br>RT    | Dako REAL™<br>Envision™ Detection<br>System, as per<br>manufacturers<br>instructions | Validated in pancreas tissue with<br>appropriate negative tissue and isotype<br>controls.<br><br>Used in >540 publications in the<br>literature.<br><br>The antibody cross-reacts with insulin<br>from several mammalian species.<br>Specificity as determined by<br>radioimmunoassay was 100% for human<br>insulin, 100% for porcine insulin and less<br>than 0.05% for glucagon and human<br>growth hormone. This product has been<br>optimised for use on human tissues.<br><br>Antibody Registry: AB_10013624<br><br><a href="https://antibodyregistry.org/search?q=A0564">https://antibodyregistry.org/search?q=A0564</a> |
| <b>Glucagon</b>         | Abcam<br>C#ab10988, [K79bB10]<br>Mouse monoclonal                                 | 10mM citrate<br>pH6.0    | 1/2000                   | Vector AP-ABC kit<br>combined with Vector<br>Red Substrate kit, as                   | Validated in pancreas tissue with<br>appropriate negative tissue and isotype<br>controls.                                                                                                                                                                                                                                                                                                                                                                                                                                                                                                                                      |

|  |  |  |  |                                |                                                                                                                                                                                                                                                                                                                                                                   |
|--|--|--|--|--------------------------------|-------------------------------------------------------------------------------------------------------------------------------------------------------------------------------------------------------------------------------------------------------------------------------------------------------------------------------------------------------------------|
|  |  |  |  | per manufacturers instructions | <p>Cite ab:<br/> <a href="https://www.citeab.com/antibodies/733352-ab10988-anti-glucagon-antibody-k79bb10">https://www.citeab.com/antibodies/733352-ab10988-anti-glucagon-antibody-k79bb10</a></p> <p>Antibody Registry: AB_297642<br/> <a href="https://antibodyregistry.org/search.php?q=AB_297642">https://antibodyregistry.org/search.php?q=AB_297642</a></p> |
|--|--|--|--|--------------------------------|-------------------------------------------------------------------------------------------------------------------------------------------------------------------------------------------------------------------------------------------------------------------------------------------------------------------------------------------------------------------|

### 1B. Accessory Agents

| Accessory Agents                                 | Company                           | Catalogue No.        | Description                                           | Details                               |
|--------------------------------------------------|-----------------------------------|----------------------|-------------------------------------------------------|---------------------------------------|
| <b>Dako REAL peroxidase blocking system</b>      | Dako<br>(now supplied by Agilent) | S2023<br>(S202386-2) | Blocking agent                                        | Use as per manufacturers instructions |
| <b>Dako Antibody Diluent</b>                     | Dako<br>(now supplied by Agilent) | S2022<br>(S202230-2) | Antibody Diluent                                      | Use as per manufacturers instructions |
| <b>Normal Goat serum</b>                         | Vector Laboratories               | S1000                | Blocking agent                                        | 5% NGS in Tris buffered saline        |
| <b>Dako REAL™ Envision-HRP, Detection System</b> | Dako<br>(now supplied by Agilent) | K5007<br>(K500711-2) | Secondary detection system used for Insulin antibody  | Use as per manufacturers instructions |
| <b>Vector AP-ABC kit (Mouse)</b>                 | Vector Laboratories               | AK-5002              | Secondary detection system used for glucagon antibody | Use as per manufacturers instructions |
| <b>Vector Red Substrate kit</b>                  | Vector Laboratories               | SK-5100              | Secondary detection system used for glucagon antibody | Use as per manufacturers instructions |
| <b>Dako Haematoxylin</b>                         | Dako<br>(now supplied by Agilent) | S2020                | Counterstain                                          | Use as per manufacturers instructions |

**ESM Table 2. Characteristics of donors in the study (n=110), and comparison by residual ICI%**

|                                                        | <b>All</b>                 | <b>Residual<br/>ICI&lt;5%<br/>N=80</b> | <b>Residual<br/>ICI≥5%<br/>N=30</b> | <b>p-value</b> |
|--------------------------------------------------------|----------------------------|----------------------------------------|-------------------------------------|----------------|
| <b>% residual ICI: Mean (SD) (range)</b>               | 9.8 (21.5)<br>(0.0, 92.2)  | 0.2 (0.5)<br>(0, 2.2)                  | 35.6 (28.3)<br>(6.4, 92.2)          | <0.001         |
| <b>Age, attained (years): Mean (SD)<br/>(range)</b>    | 27.9 (13.4)<br>(4.4, 78.0) | 30 (14.3)<br>(4.4, 78.0)               | 22.2 (8.8)<br>(11.0, 45.0)          | 0.007          |
| <b>Age at T1D onset (years): Mean<br/>(SD) (range)</b> | 12.2 (7.9)<br>(0-36)       | 11.1 (8)<br>(0.0,36.0)                 | 15.3 (6.9)<br>(3.0,35.0)            | 0.013          |
| <b>Age at T1D onset category:</b>                      |                            |                                        |                                     | 0.007          |
| <b>&lt;7 years</b>                                     | 32 (29.1%)                 | 30 (37.5%)                             | 2 (6.7%)                            |                |

|                                                    |                            |                           |                           |        |
|----------------------------------------------------|----------------------------|---------------------------|---------------------------|--------|
| <b>7-12 years</b>                                  | 31 (28.2%)                 | 20 (25.0%)                | 11 (36.7%)                |        |
| <b>≥13 years</b>                                   | 47 (42.7%)                 | 30 (37.5%)                | 17 (56.7%)                |        |
| <b>T1D duration (years): Mean (SD)<br/>(range)</b> | 15.3 (13.7) (0-74)         | 18.5 (14.3)<br>(0.0,74.0) | 7.0 (7.4)<br>(0.0,32.5)   | <0.001 |
| <b>BMI: Mean (SD) (range)</b>                      | 24.5 (4.6)<br>(12.9-42.5)  | 24.7 (4.1)<br>(15.9,37.1) | 24.1 (5.8)<br>(12.9,42.5) | 0.610  |
| <b>BMI percentile*: Mean (SD)<br/>(range)</b>      | 67.0 (26.3)<br>(2.0, 98.1) | 68.2 (24.2)<br>(2.0,98.1) | 63.9 (31.5)<br>(2.0,98.1) | 0.445  |
| <b>BMI Z-score*: Mean (SD) (range)</b>             | 0.6 (1.0)<br>(-3.4, 3.9)   | 0.6 (0.9)<br>(-2.1,3.9)   | 0.4 (1.2)<br>(-3.4,2.2)   | 0.316  |
| <b>BMI Category</b>                                |                            |                           |                           | 0.455  |
| <b>Underweight</b>                                 | 8 (7.3%)                   | 4 (5%)                    | 4 (13.3%)                 |        |

|                              |            |            |            |        |
|------------------------------|------------|------------|------------|--------|
| <b>Normal</b>                | 53 (48.2%) | 39 (48.8%) | 14 (46.7%) |        |
| <b>Overweight</b>            | 32 (29.1%) | 25 (31.3%) | 7 (23.3%)  |        |
| <b>Obese</b>                 | 17 (15.5%) | 12 (15%)   | 5 (16.7%)  |        |
| <b>Gender</b>                |            |            |            | 0.227  |
| <b>Female</b>                | 52 (47.3%) | 35 (43.8%) | 17 (56.7%) |        |
| <b>Male</b>                  | 58 (52.7%) | 45 (56.3%) | 13 (43.3%) |        |
| <b>Race/ethnicity</b>        |            |            |            | 0.083  |
| <b>Non-Hispanic White</b>    | 88 (80%)   | 68 (85%)   | 20 (66.7%) |        |
| <b>African American</b>      | 14 (12.7%) | 7 (8.8%)   | 7 (23.3%)  |        |
| <b>Hispanic/Latino</b>       | 8 (7.3%)   | 5 (6.3%)   | 3 (10%)    |        |
| <b>African American race</b> |            |            |            | 0.0410 |

|                                          |                        |                        |                        |       |
|------------------------------------------|------------------------|------------------------|------------------------|-------|
| <b>African American</b>                  | 14 (12.7%)             | 7 (8.8%)               | 7 (23.3%)              |       |
| <b>Other</b>                             | 96 ((87.3%)            | 73 (91.3%)             | 23 (76.7%)             |       |
| <b>Ancestry score: Mean (SD) (range)</b> |                        |                        |                        |       |
| <b>AFR</b>                               | 0.1 (0.3)<br>(0.0,0.9) | 0.1 (0.2)<br>(0.0,0.9) | 0.2 (0.3)<br>(0.0,0.9) | 0.043 |
| <b>AMR</b>                               | 0.0 (0.1)<br>(0.0,0.8) | 0.0 (0.1)<br>(0.0,0.8) | 0.1 (0.2)<br>(0.0,0.6) | 0.395 |
| <b>EAS</b>                               | 0.0 (0.0)<br>(0.0,0.0) | 0.0 (0.0)<br>(0.0,0.0) | 0.0 (0.0)<br>(0.0,0.0) | 0.149 |
| <b>EUR</b>                               | 0.8 (0.3)<br>(0.1,1.0) | 0.9 (0.3)<br>(0.1,1.0) | 0.7 (0.3)<br>(0.1,1.0) | 0.023 |
| <b>SAS</b>                               | 0.0 (0.0)              | 0.0 (0.0)              | 0.0 (0.0)              | 0.663 |

|                                                      | (0.0,0.1)  | (0.0,0.1)  | (0.0,0.1)  |       |
|------------------------------------------------------|------------|------------|------------|-------|
| <b><i>TCF7L2</i> rs7903146 (Major allele:<br/>C)</b> |            |            |            |       |
| <b>CC</b>                                            | 60 (54.5%) | 47 (58.8%) | 13 (43.3%) | 0.322 |
| <b>TC</b>                                            | 46 (41.8%) | 30 (37.5%) | 16 (53.3%) |       |
| <b>TT</b>                                            | 4 (3.6%)   | 3 (3.8%)   | 1 (3.3%)   |       |

\*BMI percentile and Z-score for adults were obtained by assigning the age of 20 years old.

ESM Figure 1. Distribution of ICI% in the study sample

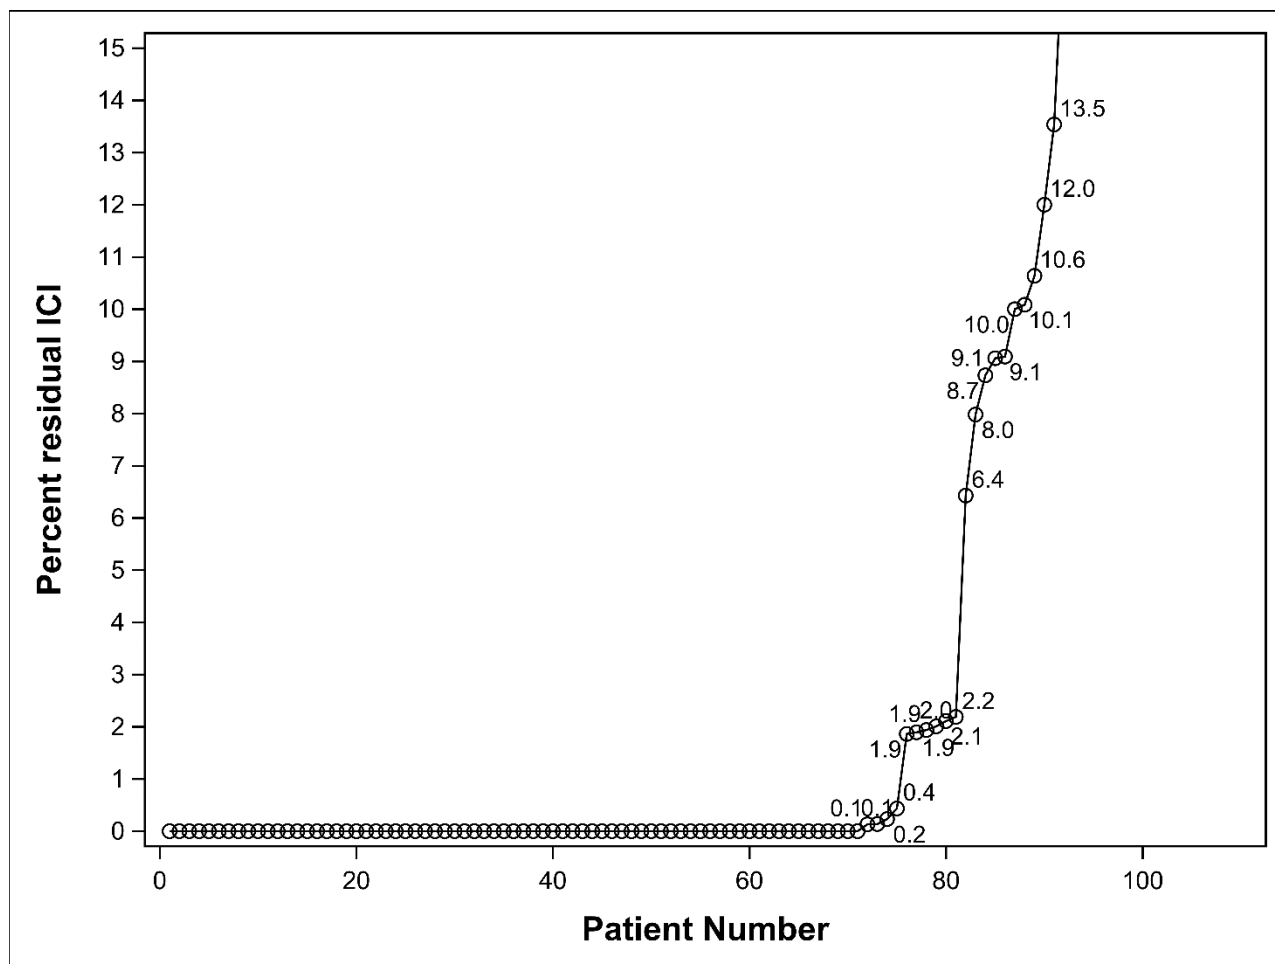



## Checklist for reporting human islet preparations used in research

Adapted from Hart NJ, Powers AC (2018) Progress, challenges, and suggestions for using human islets to understand islet biology and human diabetes. Diabetologia <https://doi.org/10.1007/s00125-018-4772-2>

**(1) Authors' note: Please note that our study examined tissue sections and not isolated islets and thus, "origin/source of islets" and "isolation centre" do not apply.**

| Islet preparation                                                           | 1            | 2                          | 3            | 4    | 5                 | 6            | 7                     | 8 <sup>a</sup> |
|-----------------------------------------------------------------------------|--------------|----------------------------|--------------|------|-------------------|--------------|-----------------------|----------------|
| <b>MANDATORY INFORMATION</b>                                                |              |                            |              |      |                   |              |                       |                |
| Unique identifier                                                           | 6025         | 6026                       | 6031         | 6032 | 6035              | 6036         | 6038                  | 6039           |
| Donor age (years)                                                           | 23.8         | 22.4                       | 39           | 33.8 | 32.1              | 49.2         | 37.2                  | 28.7           |
| Donor sex (M/F)                                                             | Male         | Male                       | Male         | Male | Male              | Female       | Female                | Female         |
| Donor BMI (kg/m <sup>2</sup> )                                              | 26.6         | 24.1                       | 24.5         | 29.4 | 27.1              | 25.5         | 30.9                  | 23.4           |
| Donor HbA <sub>1c</sub> or other measure of blood glucose control           | n/a          | n/a                        | n/a          | n/a  | n/a               | n/a          | n/a                   | n/a            |
| Origin/source of islets <sup>b</sup><br>Please see authors' note:<br>N/A    |              |                            |              |      |                   |              |                       |                |
| Islet isolation centre<br>Please see authors' note:<br>N/A                  |              |                            |              |      |                   |              |                       |                |
| Donor history of diabetes?<br>Please select yes/no from<br>drop down list   | Yes          | Yes                        | Yes          | Yes  | Yes               | Yes          | Yes                   | Yes            |
| <b>If Yes, complete the next two lines if this information is available</b> |              |                            |              |      |                   |              |                       |                |
| Diabetes duration (years)                                                   | 19.00        | 9.00                       | 35.00        | 0.00 | 28.00             | 34.00        | 20.00                 | 12.00          |
| Glucose-lowering therapy at<br>time of death <sup>c</sup>                   | Yes: insulin | Yes: Humalog<br>and Lantus | Yes: insulin | n/a  | Yes: humulin<br>N | Yes: insulin | Yes: Humulin<br>70/30 | Yes: insulin   |
| <b>RECOMMENDED INFORMATION</b>                                              |              |                            |              |      |                   |              |                       |                |

|                                                                                   |  |  |  |  |  |  |  |  |
|-----------------------------------------------------------------------------------|--|--|--|--|--|--|--|--|
| Donor cause of death                                                              |  |  |  |  |  |  |  |  |
| Warm ischaemia time (h)                                                           |  |  |  |  |  |  |  |  |
| Cold ischaemia time (h)                                                           |  |  |  |  |  |  |  |  |
| Estimated purity (%)                                                              |  |  |  |  |  |  |  |  |
| Estimated viability (%)                                                           |  |  |  |  |  |  |  |  |
| Total culture time (h) <sup>d</sup>                                               |  |  |  |  |  |  |  |  |
| Glucose-stimulated insulin secretion or other functional measurement <sup>e</sup> |  |  |  |  |  |  |  |  |
| Handpicked to purity?<br>Please select yes/no from drop down list                 |  |  |  |  |  |  |  |  |
| Additional notes                                                                  |  |  |  |  |  |  |  |  |

<sup>a</sup>If you have used more than eight islet preparations, please complete additional forms as necessary

<sup>b</sup>For example, IIDP, ECIT, Alberta IsletCore

<sup>c</sup>Please specify the therapy/therapies

<sup>d</sup>Time of islet culture at the isolation centre, during shipment and at the receiving laboratory

<sup>e</sup>Please specify the test and the results



|                                                                                   |  |  |  |  |  |  |  |  |
|-----------------------------------------------------------------------------------|--|--|--|--|--|--|--|--|
| Total culture time (h) <sup>d</sup>                                               |  |  |  |  |  |  |  |  |
| Glucose-stimulated insulin secretion or other functional measurement <sup>e</sup> |  |  |  |  |  |  |  |  |
| Handpicked to purity?<br>Please select yes/no from drop down list                 |  |  |  |  |  |  |  |  |
| Additional notes                                                                  |  |  |  |  |  |  |  |  |

|                              |           |           |           |           |           |           |           |           |
|------------------------------|-----------|-----------|-----------|-----------|-----------|-----------|-----------|-----------|
| <b>Islet preparation</b>     | <b>17</b> | <b>18</b> | <b>19</b> | <b>20</b> | <b>21</b> | <b>22</b> | <b>23</b> | <b>24</b> |
| <b>MANDATORY INFORMATION</b> |           |           |           |           |           |           |           |           |

|                                                                                   |                         |                         |              |                         |              |                             |                         |              |
|-----------------------------------------------------------------------------------|-------------------------|-------------------------|--------------|-------------------------|--------------|-----------------------------|-------------------------|--------------|
| Unique identifier                                                                 | 6061                    | 6063                    | 6064         | 6066                    | 6067         | 6070                        | 6071                    | 6077         |
| Donor age (years)                                                                 | 28.1                    | 4.4                     | 19.6         | 78                      | 32.6         | 22.6                        | 28                      | 32.9         |
| Donor sex (M/F)                                                                   | Male                    | Male                    | Female       | Male                    | Female       | Female                      | Female                  | Female       |
| Donor BMI (kg/m <sup>2</sup> )                                                    | 22.1                    | 23.8                    | 22.6         | 30.9                    | 26.8         | 21.6                        | 19.5                    | 22           |
| Donor HbA <sub>1c</sub> or other measure of blood glucose control                 | n/a                     | n/a                     | n/a          | n/a                     | n/a          | n/a                         | 7.3                     | 12.4         |
| Origin/source of islets <sup>b</sup><br>Please see authors' note:<br>N/A          |                         |                         |              |                         |              |                             |                         |              |
| Islet isolation centre<br>Please see authors' note:<br>N/A                        |                         |                         |              |                         |              |                             |                         |              |
| Donor history of diabetes?<br>Please select yes/no from drop down list            | Yes                     | Yes                     | Yes          | Yes                     | Yes          | Yes                         | Yes                     | Yes          |
| <b>If Yes, complete the next two lines if this information is available</b>       |                         |                         |              |                         |              |                             |                         |              |
| Diabetes duration (years)                                                         | 23.00                   | 3.00                    | 9.00         | 74.00                   | 8.00         | 7.00                        | 17.00                   | 19.00        |
| Glucose-lowering therapy at time of death <sup>c</sup>                            | Yes: Lantus and Novolog | Yes: Lantus and Novolog | Yes: insulin | Yes: Humalog and Lantus | Yes: insulin | Yes: Lantus (non-compliant) | Yes: Lantus and Novolog | Yes: insulin |
| <b>RECOMMENDED INFORMATION</b>                                                    |                         |                         |              |                         |              |                             |                         |              |
| Donor cause of death                                                              |                         |                         |              |                         |              |                             |                         |              |
| Warm ischaemia time (h)                                                           |                         |                         |              |                         |              |                             |                         |              |
| Cold ischaemia time (h)                                                           |                         |                         |              |                         |              |                             |                         |              |
| Estimated purity (%)                                                              |                         |                         |              |                         |              |                             |                         |              |
| Estimated viability (%)                                                           |                         |                         |              |                         |              |                             |                         |              |
| Total culture time (h) <sup>d</sup>                                               |                         |                         |              |                         |              |                             |                         |              |
| Glucose-stimulated insulin secretion or other functional measurement <sup>e</sup> |                         |                         |              |                         |              |                             |                         |              |

|                                                                      |  |  |  |  |  |  |  |  |
|----------------------------------------------------------------------|--|--|--|--|--|--|--|--|
| Handpicked to purity?<br>Please select yes/no from<br>drop down list |  |  |  |  |  |  |  |  |
| Additional notes                                                     |  |  |  |  |  |  |  |  |

| Islet preparation            | 25     | 26     | 27   | 28   | 29   | 30   | 31     | 32   |
|------------------------------|--------|--------|------|------|------|------|--------|------|
| <b>MANDATORY INFORMATION</b> |        |        |      |      |      |      |        |      |
| Unique identifier            | 6079   | 6083   | 6084 | 6087 | 6088 | 6089 | 6113   | 6119 |
| Donor age (years)            | 11.1   | 15.2   | 14.2 | 17.5 | 31.2 | 14.3 | 13.1   | 27.8 |
| Donor sex (M/F)              | Female | Female | Male | Male | Male | Male | Female | Male |

|                                                                                   |                          |              |              |                         |              |                         |              |              |
|-----------------------------------------------------------------------------------|--------------------------|--------------|--------------|-------------------------|--------------|-------------------------|--------------|--------------|
| Donor BMI (kg/m <sup>2</sup> )                                                    | 18.6                     | 18.4         | 26.3         | 21.9                    | 27           | 26                      | 24.75        | 19.4         |
| Donor HbA <sub>1c</sub> or other measure of blood glucose control                 | n/a                      | n/a          | n/a          | n/a                     | n/a          | 10.4                    | n/a          | 8.4          |
| Origin/source of islets <sup>b</sup><br>Please see authors' note:<br>N/A          |                          |              |              |                         |              |                         |              |              |
| Islet isolation centre<br>Please see authors' note:<br>N/A                        |                          |              |              |                         |              |                         |              |              |
| Donor history of diabetes?<br>Please select yes/no from drop down list            | Yes                      | Yes          | Yes          | Yes                     | Yes          | Yes                     | Yes          | Yes          |
| <b>If Yes, complete the next two lines if this information is available</b>       |                          |              |              |                         |              |                         |              |              |
| Diabetes duration (years)                                                         | 8.00                     | 11.00        | 4.00         | 4.00                    | 5.00         | 8.00                    | 1.58         | 14.00        |
| Glucose-lowering therapy at time of death <sup>c</sup>                            | Yes: Lantus, NPH, Lispro | Yes: Humalog | Yes: insulin | Yes: Humalog and Lantus | Yes: insulin | Yes: Humalog and Lantus | Yes: insulin | Yes: Novolog |
| <b>RECOMMENDED INFORMATION</b>                                                    |                          |              |              |                         |              |                         |              |              |
| Donor cause of death                                                              |                          |              |              |                         |              |                         |              |              |
| Warm ischaemia time (h)                                                           |                          |              |              |                         |              |                         |              |              |
| Cold ischaemia time (h)                                                           |                          |              |              |                         |              |                         |              |              |
| Estimated purity (%)                                                              |                          |              |              |                         |              |                         |              |              |
| Estimated viability (%)                                                           |                          |              |              |                         |              |                         |              |              |
| Total culture time (h) <sup>d</sup>                                               |                          |              |              |                         |              |                         |              |              |
| Glucose-stimulated insulin secretion or other functional measurement <sup>e</sup> |                          |              |              |                         |              |                         |              |              |
| Handpicked to purity?<br>Please select yes/no from drop down list                 |                          |              |              |                         |              |                         |              |              |

|                  |  |  |  |  |  |  |  |  |
|------------------|--|--|--|--|--|--|--|--|
| Additional notes |  |  |  |  |  |  |  |  |
|------------------|--|--|--|--|--|--|--|--|

| Islet preparation              | 33     | 34   | 35     | 36   | 37   | 38   | 39     | 40     |
|--------------------------------|--------|------|--------|------|------|------|--------|--------|
| <b>MANDATORY INFORMATION</b>   |        |      |        |      |      |      |        |        |
| Unique identifier              | 6128   | 6141 | 6143   | 6145 | 6148 | 6150 | 6152   | 6155   |
| Donor age (years)              | 33.8   | 36.7 | 32.6   | 18   | 17.1 | 41.2 | 29.6   | 50     |
| Donor sex (M/F)                | Female | Male | Female | Male | Male | Male | Female | Female |
| Donor BMI (kg/m <sup>2</sup> ) | 22.2   | 26   | 26.1   | 23.1 | 23.9 | 25.5 | 30.1   | 26     |



|                                                                                   |              |                         |                         |              |              |              |                         |                            |
|-----------------------------------------------------------------------------------|--------------|-------------------------|-------------------------|--------------|--------------|--------------|-------------------------|----------------------------|
| Donor HbA <sub>1c</sub> or other measure of blood glucose control                 | n/a          | n/a                     | n/a                     | n/a          | n/a          | n/a          | 11.3                    | n/a                        |
| Origin/source of islets <sup>b</sup><br>Please see authors' note:<br>N/A          |              |                         |                         |              |              |              |                         |                            |
| Islet isolation centre<br>Please see authors' note:<br>N/A                        |              |                         |                         |              |              |              |                         |                            |
| Donor history of diabetes?<br>Please select yes/no from drop down list            | Yes          | Yes                     | Yes                     | Yes          | Yes          | Yes          | Yes                     | Yes                        |
| <b>If Yes, complete the next two lines if this information is available</b>       |              |                         |                         |              |              |              |                         |                            |
| Diabetes duration (years)                                                         | 31.50        | 28.00                   | 7.00                    | 11.00        | 7.00         | 35.00        | 12.00                   | 43.00                      |
| Glucose-lowering therapy at time of death <sup>c</sup>                            | Yes: insulin | Yes: Lantus and Novolog | Yes: Humalog and Lantus | Yes: insulin | Yes: Humalog | Yes: insulin | Yes: Humalog and Lantus | Yes: Novolog and Novolin N |
| <b>RECOMMENDED INFORMATION</b>                                                    |              |                         |                         |              |              |              |                         |                            |
| Donor cause of death                                                              |              |                         |                         |              |              |              |                         |                            |
| Warm ischaemia time (h)                                                           |              |                         |                         |              |              |              |                         |                            |
| Cold ischaemia time (h)                                                           |              |                         |                         |              |              |              |                         |                            |
| Estimated purity (%)                                                              |              |                         |                         |              |              |              |                         |                            |
| Estimated viability (%)                                                           |              |                         |                         |              |              |              |                         |                            |
| Total culture time (h) <sup>d</sup>                                               |              |                         |                         |              |              |              |                         |                            |
| Glucose-stimulated insulin secretion or other functional measurement <sup>e</sup> |              |                         |                         |              |              |              |                         |                            |
| Handpicked to purity?<br>Please select yes/no from drop down list                 |              |                         |                         |              |              |              |                         |                            |
| Additional notes                                                                  |              |                         |                         |              |              |              |                         |                            |



|                                                                                         |              |                   |              |              |                            |              |              |              |
|-----------------------------------------------------------------------------------------|--------------|-------------------|--------------|--------------|----------------------------|--------------|--------------|--------------|
| Islet isolation centre<br>Please see authors' note:<br>N/A                              |              |                   |              |              |                            |              |              |              |
| Donor history of diabetes?<br>Please select yes/no from<br>drop down list               | Yes          | Yes               | Yes          | Yes          | Yes                        | Yes          | Yes          | Yes          |
| <b>If Yes, complete the next two lines if this information is available</b>             |              |                   |              |              |                            |              |              |              |
| Diabetes duration (years)                                                               | 44.00        | 7.00              | 30.00        | 15.00        | 15.00                      | 11.00        | 5.00         | 15.00        |
| Glucose-lowering therapy at<br>time of death <sup>c</sup>                               | Yes: insulin | Yes: Humulin<br>R | Yes: insulin | Yes: insulin | Yes: Humalog<br>and Lantus | Yes: Novolog | Yes: insulin | Yes: insulin |
| <b>RECOMMENDED INFORMATION</b>                                                          |              |                   |              |              |                            |              |              |              |
| Donor cause of death                                                                    |              |                   |              |              |                            |              |              |              |
| Warm ischaemia time (h)                                                                 |              |                   |              |              |                            |              |              |              |
| Cold ischaemia time (h)                                                                 |              |                   |              |              |                            |              |              |              |
| Estimated purity (%)                                                                    |              |                   |              |              |                            |              |              |              |
| Estimated viability (%)                                                                 |              |                   |              |              |                            |              |              |              |
| Total culture time (h) <sup>d</sup>                                                     |              |                   |              |              |                            |              |              |              |
| Glucose-stimulated insulin<br>secretion or other functional<br>measurement <sup>e</sup> |              |                   |              |              |                            |              |              |              |
| Handpicked to purity?<br>Please select yes/no from<br>drop down list                    |              |                   |              |              |                            |              |              |              |
| Additional notes                                                                        |              |                   |              |              |                            |              |              |              |



**If Yes, complete the next two lines if this information is available**

|                                                        |            |                                           |                         |                         |              |                         |                         |                  |
|--------------------------------------------------------|------------|-------------------------------------------|-------------------------|-------------------------|--------------|-------------------------|-------------------------|------------------|
| Diabetes duration (years)                              | 3.00       | 21.00                                     | 33.00                   | 10.00                   | 16.00        | 0.25                    | 4.00                    | 5.00             |
| Glucose-lowering therapy at time of death <sup>c</sup> | Yes: 70/30 | Yes: insulin (non-compliant most of time) | Yes: Lantus and Novolog | Yes: Humalog and Lantus | Yes: insulin | Yes: Humalog and Lantus | Yes: Lantus and Novolog | Insulin: Humalog |

**RECOMMENDED INFORMATION**

|                                                                                   |  |  |  |  |  |  |  |  |
|-----------------------------------------------------------------------------------|--|--|--|--|--|--|--|--|
| Donor cause of death                                                              |  |  |  |  |  |  |  |  |
| Warm ischaemia time (h)                                                           |  |  |  |  |  |  |  |  |
| Cold ischaemia time (h)                                                           |  |  |  |  |  |  |  |  |
| Estimated purity (%)                                                              |  |  |  |  |  |  |  |  |
| Estimated viability (%)                                                           |  |  |  |  |  |  |  |  |
| Total culture time (h) <sup>d</sup>                                               |  |  |  |  |  |  |  |  |
| Glucose-stimulated insulin secretion or other functional measurement <sup>e</sup> |  |  |  |  |  |  |  |  |
| Handpicked to purity?<br>Please select yes/no from drop down list                 |  |  |  |  |  |  |  |  |
| Additional notes                                                                  |  |  |  |  |  |  |  |  |

| Islet preparation                                                           | 57    | 58     | 59    | 60     | 61    | 62     | 63    | 64     |
|-----------------------------------------------------------------------------|-------|--------|-------|--------|-------|--------|-------|--------|
| <b>MANDATORY INFORMATION</b>                                                |       |        |       |        |       |        |       |        |
| Unique identifier                                                           | 6215  | 6220   | 6223  | 6224   | 6228  | 6231   | 6236  | 6237   |
| Donor age (years)                                                           | 34    | 35     | 61    | 21     | 13    | 49     | 25    | 18     |
| Donor sex (M/F)                                                             | Male  | Female | Male  | Female | Male  | Female | Male  | Female |
| Donor BMI (kg/m <sup>2</sup> )                                              | 26.6  | 27.4   | 23.4  | 22.8   | 17.36 | 25.4   | 20.1  | 26     |
| Donor HbA <sub>1c</sub> or other measure of blood glucose control           | 8     | n/a    | n/a   | n/a    | 13.3  | 10.4   | 11.6  | n/a    |
| Origin/source of islets <sup>b</sup><br>Please see authors' note:<br>N/A    |       |        |       |        |       |        |       |        |
| Islet isolation centre<br>Please see authors' note:<br>N/A                  |       |        |       |        |       |        |       |        |
| Donor history of diabetes?<br>Please select yes/no from drop down list      | Yes   | Yes    | Yes   | Yes    | Yes   | Yes    | Yes   | Yes    |
| <b>If Yes, complete the next two lines if this information is available</b> |       |        |       |        |       |        |       |        |
| Diabetes duration (years)                                                   | 15.00 | 11.00  | 52.00 | 1.50   | 0.00  | 20.00  | 11.00 | 12.00  |

|                                                                                   |              |              |              |                          |    |                         |                         |              |
|-----------------------------------------------------------------------------------|--------------|--------------|--------------|--------------------------|----|-------------------------|-------------------------|--------------|
| Glucose-lowering therapy at time of death <sup>c</sup>                            | Yes: insulin | Yes: insulin | Yes: insulin | Yes: Humulin and Novolog | No | Yes: Lantus and Novolog | Yes: Humalog and Lantus | Yes: insulin |
| <b>RECOMMENDED INFORMATION</b>                                                    |              |              |              |                          |    |                         |                         |              |
| Donor cause of death                                                              |              |              |              |                          |    |                         |                         |              |
| Warm ischaemia time (h)                                                           |              |              |              |                          |    |                         |                         |              |
| Cold ischaemia time (h)                                                           |              |              |              |                          |    |                         |                         |              |
| Estimated purity (%)                                                              |              |              |              |                          |    |                         |                         |              |
| Estimated viability (%)                                                           |              |              |              |                          |    |                         |                         |              |
| Total culture time (h) <sup>d</sup>                                               |              |              |              |                          |    |                         |                         |              |
| Glucose-stimulated insulin secretion or other functional measurement <sup>e</sup> |              |              |              |                          |    |                         |                         |              |
| Handpicked to purity?<br>Please select yes/no from drop down list                 |              |              |              |                          |    |                         |                         |              |
| Additional notes                                                                  |              |              |              |                          |    |                         |                         |              |





|                                                                                   |  |  |  |  |  |  |  |  |
|-----------------------------------------------------------------------------------|--|--|--|--|--|--|--|--|
| Warm ischaemia time (h)                                                           |  |  |  |  |  |  |  |  |
| Cold ischaemia time (h)                                                           |  |  |  |  |  |  |  |  |
| Estimated purity (%)                                                              |  |  |  |  |  |  |  |  |
| Estimated viability (%)                                                           |  |  |  |  |  |  |  |  |
| Total culture time (h) <sup>d</sup>                                               |  |  |  |  |  |  |  |  |
| Glucose-stimulated insulin secretion or other functional measurement <sup>e</sup> |  |  |  |  |  |  |  |  |
| Handpicked to purity?<br>Please select yes/no from drop down list                 |  |  |  |  |  |  |  |  |
| Additional notes                                                                  |  |  |  |  |  |  |  |  |



|                                                                                   |  |  |  |  |  |  |  |  |
|-----------------------------------------------------------------------------------|--|--|--|--|--|--|--|--|
| Warm ischaemia time (h)                                                           |  |  |  |  |  |  |  |  |
| Cold ischaemia time (h)                                                           |  |  |  |  |  |  |  |  |
| Estimated purity (%)                                                              |  |  |  |  |  |  |  |  |
| Estimated viability (%)                                                           |  |  |  |  |  |  |  |  |
| Total culture time (h) <sup>d</sup>                                               |  |  |  |  |  |  |  |  |
| Glucose-stimulated insulin secretion or other functional measurement <sup>e</sup> |  |  |  |  |  |  |  |  |
| Handpicked to purity?<br>Please select yes/no from drop down list                 |  |  |  |  |  |  |  |  |
| Additional notes                                                                  |  |  |  |  |  |  |  |  |



|                                                                                   |  |  |  |  |  |  |  |  |
|-----------------------------------------------------------------------------------|--|--|--|--|--|--|--|--|
| Total culture time (h) <sup>d</sup>                                               |  |  |  |  |  |  |  |  |
| Glucose-stimulated insulin secretion or other functional measurement <sup>e</sup> |  |  |  |  |  |  |  |  |
| Handpicked to purity?<br>Please select yes/no from drop down list                 |  |  |  |  |  |  |  |  |
| Additional notes                                                                  |  |  |  |  |  |  |  |  |

|                              |           |           |           |           |           |           |           |           |
|------------------------------|-----------|-----------|-----------|-----------|-----------|-----------|-----------|-----------|
| <b>Islet preparation</b>     | <b>89</b> | <b>90</b> | <b>91</b> | <b>92</b> | <b>93</b> | <b>94</b> | <b>95</b> | <b>96</b> |
| <b>MANDATORY INFORMATION</b> |           |           |           |           |           |           |           |           |
| Unique identifier            | 6322      | 6323      | 6325      | 6327      | 6328      | 6330      | 6337      | 6341      |

|                                                                                   |              |              |              |              |              |              |              |              |
|-----------------------------------------------------------------------------------|--------------|--------------|--------------|--------------|--------------|--------------|--------------|--------------|
| Donor age (years)                                                                 | 22           | 22           | 20           | 71.2         | 39           | 22           | 20.6         | 26           |
| Donor sex (M/F)                                                                   | Male         | Female       | Female       | Male         | Male         | Male         | Female       | Male         |
| Donor BMI (kg/m <sup>2</sup> )                                                    | 23.6         | 24.7         | 31.2         | 23.2         | 23.98        | 22.6         | 17.9         | 21.8         |
| Donor HbA <sub>1c</sub> or other measure of blood glucose control                 | n/a          | 6.6          | n/a          | n/a          | 8.7          | n/a          | 12.5         | 13.6         |
| Origin/source of islets <sup>b</sup><br>Please see authors' note:<br>N/A          |              |              |              |              |              |              |              |              |
| Islet isolation centre<br>Please see authors' note:<br>N/A                        |              |              |              |              |              |              |              |              |
| Donor history of diabetes?<br>Please select yes/no from drop down list            | Yes          | Yes          | Yes          | Yes          | Yes          | Yes          | Yes          | Yes          |
| <b>If Yes, complete the next two lines if this information is available</b>       |              |              |              |              |              |              |              |              |
| Diabetes duration (years)                                                         | 17.00        | 6.00         | 6.00         | 57.00        | 20.00        | 18.00        | 5.00         | 15.00        |
| Glucose-lowering therapy at time of death <sup>c</sup>                            | Yes: insulin | Yes: Novolog | Yes: insulin | Yes: insulin | Yes: insulin | Yes: Novolog | Yes: insulin | Yes: insulin |
| <b>RECOMMENDED INFORMATION</b>                                                    |              |              |              |              |              |              |              |              |
| Donor cause of death                                                              |              |              |              |              |              |              |              |              |
| Warm ischaemia time (h)                                                           |              |              |              |              |              |              |              |              |
| Cold ischaemia time (h)                                                           |              |              |              |              |              |              |              |              |
| Estimated purity (%)                                                              |              |              |              |              |              |              |              |              |
| Estimated viability (%)                                                           |              |              |              |              |              |              |              |              |
| Total culture time (h) <sup>d</sup>                                               |              |              |              |              |              |              |              |              |
| Glucose-stimulated insulin secretion or other functional measurement <sup>e</sup> |              |              |              |              |              |              |              |              |
| Handpicked to purity?<br>Please select yes/no from drop down list                 |              |              |              |              |              |              |              |              |

|                  |  |  |  |  |  |  |  |  |
|------------------|--|--|--|--|--|--|--|--|
| Additional notes |  |  |  |  |  |  |  |  |
|------------------|--|--|--|--|--|--|--|--|

| Islet preparation              | 97     | 98     | 99   | 100  | 101    | 102    | 103    | 104   |
|--------------------------------|--------|--------|------|------|--------|--------|--------|-------|
| <b>MANDATORY INFORMATION</b>   |        |        |      |      |        |        |        |       |
| Unique identifier              | 6342   | 6360   | 6362 | 6367 | 6371   | 6380   | 6396   | 6399  |
| Donor age (years)              | 14     | 4.8    | 24.9 | 24   | 12.5   | 11.6   | 17.1   | 17.42 |
| Donor sex (M/F)                | Female | Female | Male | Male | Female | Female | Female | Male  |
| Donor BMI (kg/m <sup>2</sup> ) | 24.3   | 26.1   | 28.5 | 25.7 | 16.6   | 14.6   | 22.6   | 32    |

|                                                                                   |              |                         |                                                         |                         |                         |      |                         |      |
|-----------------------------------------------------------------------------------|--------------|-------------------------|---------------------------------------------------------|-------------------------|-------------------------|------|-------------------------|------|
| Donor HbA <sub>1c</sub> or other measure of blood glucose control                 | 9.2          | 10.2                    | 10                                                      | 8.8                     | 9.5                     | 13.5 | 13.4                    | 10.4 |
| Origin/source of islets <sup>b</sup><br>Please see authors' note:<br>N/A          |              |                         |                                                         |                         |                         |      |                         |      |
| Islet isolation centre<br>Please see authors' note:<br>N/A                        |              |                         |                                                         |                         |                         |      |                         |      |
| Donor history of diabetes?<br>Please select yes/no from drop down list            | Yes          | Yes                     | Yes                                                     | Yes                     | Yes                     | Yes  | Yes                     | Yes  |
| <b>If Yes, complete the next two lines if this information is available</b>       |              |                         |                                                         |                         |                         |      |                         |      |
| Diabetes duration (years)                                                         | 2.00         | 2.50                    | 0.00                                                    | 2.00                    | 2.00                    | 0.00 | 2.00                    | 0.00 |
| Glucose-lowering therapy at time of death <sup>c</sup>                            | Yes: insulin | Yes: Humalog and Lantus | None at home reportedly; insulin IV drip upon admission | Yes: Lantus and Novolog | Yes: Lantus and Novolog | No   | Yes: Humalog and Lantus | No   |
| <b>RECOMMENDED INFORMATION</b>                                                    |              |                         |                                                         |                         |                         |      |                         |      |
| Donor cause of death                                                              |              |                         |                                                         |                         |                         |      |                         |      |
| Warm ischaemia time (h)                                                           |              |                         |                                                         |                         |                         |      |                         |      |
| Cold ischaemia time (h)                                                           |              |                         |                                                         |                         |                         |      |                         |      |
| Estimated purity (%)                                                              |              |                         |                                                         |                         |                         |      |                         |      |
| Estimated viability (%)                                                           |              |                         |                                                         |                         |                         |      |                         |      |
| Total culture time (h) <sup>d</sup>                                               |              |                         |                                                         |                         |                         |      |                         |      |
| Glucose-stimulated insulin secretion or other functional measurement <sup>e</sup> |              |                         |                                                         |                         |                         |      |                         |      |
| Handpicked to purity?<br>Please select yes/no from drop down list                 |              |                         |                                                         |                         |                         |      |                         |      |



|                  |  |  |  |  |  |  |  |  |
|------------------|--|--|--|--|--|--|--|--|
| Additional notes |  |  |  |  |  |  |  |  |
|------------------|--|--|--|--|--|--|--|--|

| Islet preparation              | 105    | 106   | 107    | 108    | 109   | 110    |  |  |
|--------------------------------|--------|-------|--------|--------|-------|--------|--|--|
| <b>MANDATORY INFORMATION</b>   |        |       |        |        |       |        |  |  |
| Unique identifier              | 6405   | 6418  | 6435   | 6472   | 6473  | 6477   |  |  |
| Donor age (years)              | 29.1   | 24.86 | 24.75  | 10.25  | 13.21 | 19.87  |  |  |
| Donor sex (M/F)                | Female | Male  | Female | Female | Male  | Female |  |  |
| Donor BMI (kg/m <sup>2</sup> ) | 42.5   | 26.4  | 26.9   | 16.6   | 17.9  | 25.3   |  |  |

|                                                                                   |              |              |                          |              |             |                                                |  |  |
|-----------------------------------------------------------------------------------|--------------|--------------|--------------------------|--------------|-------------|------------------------------------------------|--|--|
| Donor HbA <sub>1c</sub> or other measure of blood glucose control                 | 7            | 7.5          | 11.6                     | 9.7          | 12.8        | 10.9                                           |  |  |
| Origin/source of islets <sup>b</sup><br>Please see authors' note:<br>N/A          |              |              |                          |              |             |                                                |  |  |
| Islet isolation centre<br>Please see authors' note:<br>N/A                        |              |              |                          |              |             |                                                |  |  |
| Donor history of diabetes?<br>Please select yes/no from drop down list            | Yes          | Yes          | Yes                      | Yes          | Yes         | Yes                                            |  |  |
| <b>If Yes, complete the next two lines if this information is available</b>       |              |              |                          |              |             |                                                |  |  |
| Diabetes duration (years)                                                         | 0.60         | 11.00        | 14.75                    | 4.00         | 6.00        | 8.00                                           |  |  |
| Glucose-lowering therapy at time of death <sup>c</sup>                            | Yes: insulin | Yes: insulin | Yes: Insulin and Tresiba | Yes: insulin | Yes: Lantus | Yes: Lantus, Humalog, Insulin aspart/ degludec |  |  |
| <b>RECOMMENDED INFORMATION</b>                                                    |              |              |                          |              |             |                                                |  |  |
| Donor cause of death                                                              |              |              |                          |              |             |                                                |  |  |
| Warm ischaemia time (h)                                                           |              |              |                          |              |             |                                                |  |  |
| Cold ischaemia time (h)                                                           |              |              |                          |              |             |                                                |  |  |
| Estimated purity (%)                                                              |              |              |                          |              |             |                                                |  |  |
| Estimated viability (%)                                                           |              |              |                          |              |             |                                                |  |  |
| Total culture time (h) <sup>d</sup>                                               |              |              |                          |              |             |                                                |  |  |
| Glucose-stimulated insulin secretion or other functional measurement <sup>e</sup> |              |              |                          |              |             |                                                |  |  |
| Handpicked to purity?<br>Please select yes/no from drop down list                 |              |              |                          |              |             |                                                |  |  |

|                  |  |  |  |  |  |  |  |  |
|------------------|--|--|--|--|--|--|--|--|
| Additional notes |  |  |  |  |  |  |  |  |
|------------------|--|--|--|--|--|--|--|--|
